# Supplementary material for: Third-line treatment options in metastatic pancreatic cancer patients: a real-world study
Source: Front Oncol. 2023 Sep 21;13:1251258. doi: 10.3389/fonc.2023.1251258 (PMC10552515; doi:10.3389/fonc.2023.1251258)
Supplement: Supplementary file 1 [file Table_1.xlsx]

## Sheet: Sheet1
Supplementary Table 1. Univariate and multivariate analyses of independent factors of overall survival of third-line treatment.
Variable	Univariate analyses				Multivariate analyses
	HR	95%CI	p value		HR	95%CI	p value
Sex	0.436	0.204-0.930	0.032		0.285	0.116-0.702	0.006
Age	0.981	0.943-1.020	0.329
BMI
healthy	-	-	0.401
thin	0.271	0.036-2.058	0.207
overweight	0.419	0.032-4.164	0.419
obesity	0.509	0.058-4.111	0.509
ECOG PS	0.26	0.126-0.538	＜0.001		0.166	0.071-0.388	＜0.001
First-line treatment	1.319	0.679-2.565	0.414
First-line PFS (months)	1.009	0.954-1.066	0.756
Second-line treatment
F-based	1.423	0.191-10.580	0.73
G-based	0.801	0.102-6.304	0.833
Other	-	-	0.292
Second-line PFS (months)	0.921	0.847-1.001	0.052		0.902	0.826-1.985	0.122
First and second line treatment order
G-based to F-based	-	-	0.128		-	-	0.212
G-based to G-based	0.541	0.071-4.114	0.553		6.333	0.690-58.157	0.103
G-based to Other	0.107	0.009-1.261	0.076		1.528	0.106-21.944	0.755
F-based to G-based	-	-	0.98		-	-	0.985
F-based to F-based	0.24	0.029-1.985	0.186		3.747	0.333-42.175	0.285
F-based to Other	0.221	0.025-1.983	0.177		2.687	0.250-28.867	0.415
Sum of first and second line PFS	0.973	0.929-1.019	0.25
Family history of cancer	0.38	0.176-0.823	0.014		0.374	0.150-0.935	0.035
Tumor location
Head	-	-	0.339
Body	1.497	0.439-5.103	0.519
Tail	0.936	0.266-3.302	0.919
Head+body	-	-	0.983
Body+tail	6.87	0.674-70.060	0.104
Metastatic type
Liver	1.062	0.536-2.107	0.862
Peritoneal	1.214	0.630-2.340	0.562
Lung	3.24	0.764-13.747	0.111
Distant lymph node	0.796	0.307-2.065	0.639
Metastatic number	-	-	0.424
Previous surgery	1.199	0.613-2.347	0.596
CEA (U/mL)	0.752	0.369-1.531	0.431
CA125 (U/mL)	0.436	0.212-0.898	0.024		0.734	0.337-1.599	0.436
CA199 (U/mL)	0.909	0.373-2.215	0.834
NLR	0.788	0.408-1.522	0.479
PLR	1.121	0.549-2.288	0.753
BMI, Body Mass Index; ECOG PS, Eastern Cooperative Oncology Group Performance status; G-based, Gemcitabine based therapy; F-based, Fluorouracil based treatment; PFS, Progression-free survival; NLR, Neutrophil to lymphocyte ratio; PLR, Platelet to lymphocyte ratio; MLR, Monocyte to lymphocyte ratio.
