# Supplementary material for: Third-line treatment options in metastatic pancreatic cancer patients: a real-world study
Source: Front Oncol. 2023 Sep 21;13:1251258. doi: 10.3389/fonc.2023.1251258 (PMC10552515; doi:10.3389/fonc.2023.1251258)
Supplement: Supplementary file 2 [file Table_2.xlsx]

## Sheet: Sheet1
Supplementary Table 2. Univariate and multivariate analyses of independent factors of overall survival of chemotherapy alone therapy.
Variable	Univariate analyses				Multivariate analyses
	HR	95%CI	p value		HR	95%CI	p value
Sex	0.474	0.149-1.504	0.205
Age	0.965	0.902-1.033	0.31
BMI
healthy	-	-	0.306
thin	0.557	0.033-9.535	0.686
overweight	0.17	0.020-1.466	0.107
obesity	0.312	0.027-3.573	0.349
ECOG PS	0.51	0.156-1.671	0.266
First-line treatment	1.864	0.591-5.874	0.288
First-line PFS (months)	0.977	0.856-1.114	0.7272
Second-line treatment	0.794	0.266-2.374	0.68
Second-line PFS (months)	0.967	0.856-1.091	0.583
First and second line treatment order
G-based to F-based	-	-	0.439		-	-	0.41
G-based to G-based	6.739	0.738-61.558	0.091		8.142	0.918-72.244	0.06
G-based to Other	2.069	0.187-22.926	0.553		2.936	0.249-34.650	0.392
F-based to G-based	-	-	0.9		-	-	0.988
F-based to F-based	4.095	0.372-45.066	0.249		6.046	0.545-67.083	0.143
Sum of first and second line PFS	0.975	0.899-1.059	0.551
Family history of cancer	0.263	0.080-0.862	0.028		0.221	0.061-0.795	0.021
Tumor location
Head	-	-	0.916
Tail	-	-	0.988
Head+body	0.561	0.115-2.744	0.476
Body+tail	0.661	0.130-3.374	0.619
Metastatic type
Liver	0.602	0.189-1.919	0.391
Peritoneal	1.304	0.472-3.606	0.609
Lung	31.76	0.114-8822.122	0.228
Distant lymph node	0.461	0.101-2.091	0.315
Previous surgery	1.286	0.449-3.685	0.64
CEA (U/mL)	0.916	0.323-2.595	0.868
CA125 (U/mL)	0.537	0.186-1.554	0.252
CA199 (U/mL)	0.975	0.266-3.571	0.97
NLR	0.878	0.318-2.430	0.803
PLR	0.961	0.340-2.714	0.939
BMI, Body Mass Index; ECOG PS, Eastern Cooperative Oncology Group Performance status; G-based, Gemcitabine based therapy; F-based, Fluorouracil based treatment; PFS, Progression-free survival; NLR, Neutrophil to lymphocyte ratio; PLR, Platelet to lymphocyte ratio; MLR, Monocyte to lymphocyte ratio.
