# Supplementary material for: Third-line treatment options in metastatic pancreatic cancer patients: a real-world study
Source: Front Oncol. 2023 Sep 21;13:1251258. doi: 10.3389/fonc.2023.1251258 (PMC10552515; doi:10.3389/fonc.2023.1251258)
Supplement: Supplementary file 3 [file Table_3.xlsx]

## Sheet: Sheet1
Supplementary Table 3. Univariate and multivariate analyses of independent factors of overall survival of chemotherapy combined with targeted or immunotherapy.
Variable	Univariate analyses				Multivariate analyses
	HR	95%CI	p value		HR	95%CI	p value
Sex	0.138	0.016-1.217	0.075		0.256	0.027-2.439	0.236
Age	1.024	0.914-1.147	0.686
BMI
healthy	-	-	0.885
thin	0.563	0.058-5.467	0.621
overweight	-	-	0.991
ECOG PS	0.117	0.013-1.026	0.053		0.191	0.020-1.843	0.152
First-line treatment	1.103	0.197-6.165	0.911
First-line PFS (months)	0.918	0.632-1.335	0.656
Second-line treatment
F-based			0.7
G-based	18062.6	-	0.963
Other	38342.4	-	0.96
Second-line PFS (months)	0.963	0.758-1.224	0.758
First and second line treatment order
G-based to F-based	-	-	0.989
G-based to G-based	5731.03	-	0.958
G-based to Other	0.947	-	1
F-based to G-based	0.981	-	1
F-based to F-based	3554.76	-	0.96
Sum of first and second line PFS	0.934	0.746-1.169	0.552
Family history of cancer	0.799	0.091-7.049	0.84
Tumor location
Head	-	-	0.734
Tail	1.114	0.114-10.851	0.926
Body+tail	2.149	0.189-24.433	0.537
Metastatic type
Liver	1.327	0.230-7.646	0.751
Peritoneal	0.529	0.096-2.898	0.463
Lung	24.11	-	0.622
Distant lymph node	0.869	0.095-7.925	0.901
Previous surgery	1.652	0.193-14.161	0.647
CEA (U/mL)	-	-	0.495
CA125 (U/mL)	-	-	0.228
CA199 (U/mL)	-	-	0.558
NLR	0.623	0.124-3.138	0.566
PLR	1.222	0.138-10.819	0.857
BMI, Body Mass Index; ECOG PS, Eastern Cooperative Oncology Group Performance status; G-based, Gemcitabine based therapy; F-based, Fluorouracil based treatment; PFS, Progression-free survival; NLR, Neutrophil to lymphocyte ratio; PLR, Platelet to lymphocyte ratio; MLR, Monocyte to lymphocyte ratio.
