# Supplementary material for: Third-line treatment options in metastatic pancreatic cancer patients: a real-world study
Source: Front Oncol. 2023 Sep 21;13:1251258. doi: 10.3389/fonc.2023.1251258 (PMC10552515; doi:10.3389/fonc.2023.1251258)
Supplement: Supplementary file 4 [file Table_4.xlsx]

## Sheet: Sheet1
Supplementary Table 4. Univariate and multivariate analyses of independent factors of overall survival of chemotherapy-free antitumor therapy.
Variable	Univariate analyses
	HR	95%CI	p value
Sex	0.389	0.046-3.285	0.386
Age	0.983	0.918-1.052	0.614
BMI
healthy	0.814	0.095-7.010	0.852
thin	2.28	0.134-38.779	0.569
overweight	-	-	0.662
ECOG PS	0.439	0.087-2.209	0.318
First-line treatment	3.481	0.571-21.209	0.176
First-line PFS (months)	1.024	0.969-1.083	0.401
Second-line treatment
F-based	0.31	0.031-3.138	0.321
G-based	0.96	0.101-9.164	0.972
Other	-	-	0.3
Second-line PFS (months)	0.837	0.686-1.022	0.081
First and second line treatment order
G-based to F-based	2.499	0.219-28.504	0.461
G-based to G-based	-	-	0.991
F-based to G-based	0.191	0.014-2.541	0.21
F-based to F-based	0.444	0.033-5.996	0.541
F-based to Other	-	-	0.253
Sum of first and second line PFS	0.978	0.922-1.038	0.469
Family history of cancer	1.061	0.201-5.600	0.944
Tumor location
Head	-	-	0.39
Body	-	-	0.959
Tail	-	-	0.964
Body+tail	-	-	0.956
Metastatic type
Liver	0.819	0.150-4.460	0.817
Peritoneal	1.053	0.260-4.265	0.942
Lung	1.029	0.119-8.910	0.979
Distant lymph node	1.074	0.216-5.352	0.931
Previous surgery	1.52	0.356-6.491	0.572
CEA (U/mL)	0.537	0.108-2.668	0.447
CA125 (U/mL)	0.479	0.058-3.990	0.496
CA199 (U/mL)	1.694	0.325-8.845	0.532
NLR	0.524	0.126-2.184	0.375
PLR	0.746	0.174-3.193	0.693
BMI, Body Mass Index; ECOG PS, Eastern Cooperative Oncology Group Performance status; G-based, Gemcitabine based therapy; F-based, Fluorouracil based treatment; PFS, Progression-free survival; NLR, Neutrophil to lymphocyte ratio; PLR, Platelet to lymphocyte ratio; MLR, Monocyte to lymphocyte ratio.
