# Supplementary material for: Third-line treatment options in metastatic pancreatic cancer patients: a real-world study
Source: Front Oncol. 2023 Sep 21;13:1251258. doi: 10.3389/fonc.2023.1251258 (PMC10552515; doi:10.3389/fonc.2023.1251258)
Supplement: Supplementary file 5 [file Table_5.xlsx]

## Sheet: Sheet1
Supplementary Table 5. Univariate and multivariate analyses of independent factors of overall survival of chemotherapy-based regiments.
Variable	Univariate analyses				Multivariate analyses
	HR	95%CI	p value		HR	95%CI	p value
Sex	0.528	0.205-1.364	0.187
Age	1.005	0.963-1.050	0.815
BMI
thin	0.231	0.014-3.969	0.313		0.067	0.003-1.392	0.081
healthy	-	-	0.371		-	-	0.143
overweight	0.156	0.019-1.284	0.084		0.069	0.007-0.666	0.021
obesity	0.142	0.013-1.516	0.106		0.093	0.007-1.184	0.067
ECOG PS	0.46	0.177-1.193	0.11
First-line treatment	1.961	0.785-4.899	0.149
First-line PFS (months)	1.017	0.930-1.113	0.705
Second-line treatment
F-based	-	-	0.991
G-based	24311.4	-	0.941
Other	25522.7	-	0.941
Second-line PFS (months)	0.962	0.888-1.043	0.352
First and second line treatment order
G-based to F-based	-	-	0.336		-	-	0.421
G-based to G-based	3.281	0.413-26.031	0.261		2.683	0.316-22.793	0.366
G-based to Other	5.975	0.647-55.186	0.115		4.873	0.476-49.917	0.182
F-based to G-based	4.517	0.397-51.419	0.224		5.286	0.424-65.961	0.196
F-based to F-based	7.242	0.848-61.845	0.07		6.015	0.623-58.064	0.121
Sum of first and second line PFS	0.987	0.939-1.039	0.62
Family history of cancer	0.232	0.077-0.701	0.01		0.226	0.065-0.784	0.019
Tumor location
Head	-	-	0.514
Tail	-	-	0.983
Head+body	0.399	0.103-1.545	0.184
Body+tail	0.355	0.090-1.392	0.137
Metastatic type
Liver	0.848	0.338-2.128	0.725
Peritoneal	0.858	0.366-2.007	0.723
Lung	29.385	0.265-3256.424	0.159
Distant lymph node	0.914	0.264-3.159	0.887
Previous surgery	1.397	0.592-3.301	0.446
CEA (U/mL)	0.64	0.250-1.640	0.353
CA125 (U/mL)	0.564	0.240-1.329	0.191
CA199 (U/mL)	0.593	0.174-2.022	0.404
NLR	0.978	0.419-2.281	0.959
PLR	1.641	0.657-4.097	0.289
BMI, Body Mass Index; ECOG PS, Eastern Cooperative Oncology Group Performance status; G-based, Gemcitabine based therapy; F-based, Fluorouracil based treatment; PFS, Progression-free survival; NLR, Neutrophil to lymphocyte ratio; PLR, Platelet to lymphocyte ratio; MLR, Monocyte to lymphocyte ratio.
