# Supplementary material for: Third-line treatment options in metastatic pancreatic cancer patients: a real-world study
Source: Front Oncol. 2023 Sep 21;13:1251258. doi: 10.3389/fonc.2023.1251258 (PMC10552515; doi:10.3389/fonc.2023.1251258)
Supplement: Supplementary file 6 [file Table_6.xlsx]

## Sheet: Sheet1
Supplementary Table 6. Univariate and multivariate analyses of independent factors of overall survival of multi-agent chemotherapy.
Variable	Univariate analyses				Multivariate analyses
	HR	95%CI	p value		HR	95%CI	p value
Sex	1.497	0.401-5.592	0.549
Age	0.994	0.917-1.077	0.876
BMI
thin	-	-	1
healthy	-	-	0.963
overweight	-	-	0.964
obesity	-	-	0.966
ECOG PS	0.288	0.074-1.128	0.074		0.31	0.073-1.326	0.114
First-line treatment	0.648	0.173-2.422	0.519
First-line PFS (months)	0.941	0.765-1.159	0.568
Second-line treatment
F-based	0.085	0.006-1.257	0.073		0.137	0.009-2.069	0.151
G-based	0.114	0.010-1.297	0.08		0.213	0.017-2.595	0.255
Other	-	-	0.176		-	-	0.355
Second-line PFS (months)	0.859	0.659-1.119	0.259
First and second line treatment order
G-based to F-based	-	-	0.976
G-based to G-based	0.665	0.146-2.941	0.58
G-based to Other	-	-	0.992
F-based to G-based	-	-	0.992
F-based to F-based	0.566	0.094-3.401	0.534
Sum of first and second line PFS	0.903	0.757-1.079	0.262
Histology	0.801	0.166-3.869	0.782
Tumor location
Head	-	-	0.934
Tail	-	-	0.988
Head+body	0.522	0.062-4.420	0.551
Body+tail	0.458	0.040-5.195	0.529
Metastatic type
Liver	1.615	0.430-6.070	0.478
Peritoneal	0.752	0.155-3.652	0.724
Lung	0.544	0.111-2.658	0.452
Distant lymph node	-	-	0.539
Previous surgery	1.761	0.471-6.585	0.4
CEA (U/mL)	1.086	0.304-3.883	0.899
CA125 (U/mL)	0.499	0.132-1.894	0.307
CA199 (U/mL)	0.524	0.129-2.132	0.366
NLR	1.035	0.283-3.776	0.959
PLR	3.248	0.694-15.188	0.134
BMI, Body Mass Index; ECOG PS, Eastern Cooperative Oncology Group Performance status; G-based, Gemcitabine based therapy; F-based, Fluorouracil based treatment; PFS, Progression-free survival; NLR, Neutrophil to lymphocyte ratio; PLR, Platelet to lymphocyte ratio; MLR, Monocyte to lymphocyte ratio.
